# Supplementary material
Source: publisher figshare collection journal article supplement (https://tandf.figshare.com/ndownloader/files/24690275)
Supplement: Supplementary file 1 [file 24690275]

|  |  | **Relative abundance (%)1** | | | | |
| --- | --- | --- | --- | --- | --- | --- |
|  |  | **Age** | | | | |
| **Fatty acid** | **Numerical formula** | **E13** | **E15** | **E17** | **7** | **14** |
| Myristate | C14:0 | 2.72 | 1.67 | 0.88 | 0.82 | 0.86 |
| Pentadecanoate | C15:1 | 0.38 | 0.30 | 0.12 | 0.11 | 0.10 |
| Palmitate | C16:0 | 43.03 | 37.25 | 23.76 | 31.28 | 31.12 |
| Palmitoleate | C16:1 | 0.30 | 0.52 | 0.23 | 4.35 | 4.73 |
| Heptadecanoate | C17:0 | 0.64 | 0.58 | 0.28 | 0.25 | 0.23 |
| cis-10-Heptadecenoic acid | C17:1 | 0.01 | 0.01 | 0.01 | 0.08 | 0.07 |
| Stearate | C18:0 | 38.86 | 41.66 | 47.12 | 18.94 | 20.15 |
| Oleate | C18:1 n-9 | 6.79 | 8.71 | 8.58 | 24.26 | 27.63 |
| Linoleate | C18:2 n-6 | 1.70 | 2.58 | 3.94 | 12.55 | 9.87 |
| y-linolenate | C18:3 n-6 | 0.01 | 0.01 | 0.02 | 0.17 | 0.10 |
| Linolenate | C18:3 n-3 | 0.01 | 0.02 | 0.01 | 0.80 | 0.55 |
| Stearidonate2 | C18:4 n-3 | 1.48 | 0.14 | 0.23 | 0.01 | 0.02 |
| Arachidate | C20:0 | 0.25 | 0.23 | 0.25 | 0.40 | 0.44 |
| cis-11-Eicosenoate | C20:1 | 0.06 | 0.10 | 0.11 | 0.29 | 0.31 |
| cis-11-14-Eicosadienoic acid | C20:2 n-6 | 0.02 | 0.03 | 0.05 | 0.14 | 0.12 |
| cis-11-14-17-Eicosatrienoic acid | C20:3 n-3 | 0.08 | 0.14 | 0.38 | 0.29 | 0.35 |
| Heneicosanoate | C21:0 | 0.05 | 0.04 | 0.04 | 0.03 | 0.03 |
| cis-5-8-11-14-Arachidonate | C20:4 n-6 | 2.05 | 3.89 | 8.85 | 2.75 | 3.02 |
| cis-5-8-11-14-17-Eicosapentaenoate | C20:5 n-3 | 0.00 | 0.01 | 0.02 | 0.14 | 0.18 |
| Behenate | C22:0 | 0.25 | 0.19 | 0.25 | 0.39 | 0.35 |
| Erucate | C22:1 | 0.43 | 0.12 | 0.15 | 0.05 | 0.07 |
| cis-13-16-Docosadienoate | C22:2 n-6 | 0.00 | 0.00 | 0.00 | 0.01 | 0.01 |
| Tricosanoate | C23:0 | 0.01 | 0.01 | 0.03 | 0.05 | 0.05 |
| Docosapentaenoate2 | C22:5 n-3 | 0.43 | 0.90 | 2.48 | 0.25 | 0.21 |
| Lignocerate | C23:0 | 0.02 | 0.02 | 0.03 | 0.12 | 0.08 |
| cis-4-7-10-13-16-19-docosahexaenoate | C22:6 n-3 | 0.23 | 0.52 | 1.36 | 0.18 | 0.21 |
| Nervonate | C24:1 | 0.02 | 0.02 | 0.04 | 0.10 | 0.10 |

1 relative abundance of each fatty acid in subcutaneous adipose tissue, expressed as a percentage of all fatty acids measured; values represent averages within each age group (n = 5-7/age)

2 identity inferred from m/z and relative retention time
